# Supplementary material for: A metastable RuIII azido complex with metallo-Staudinger reactivity
Source: Royal Society of Chemistry journal article supplement (doi:10.1039/d0cc04426a), 2020-01-01
Supplement: d0cc04426a1.pdf [file d0cc04426a1.pdf]

## A Transient Ru<sup>III</sup> Azide Complex with Metallo-Staudinger Reactivity

Sungho V. Park,<sup>†</sup> Charles G. Fry,<sup>†</sup> Eckhard Bill<sup>‡</sup> and John F. Berry<sup>\*,†</sup>

<sup>†</sup>Department of Chemistry, University of Wisconsin – Madison, 1101 University Avenue, Madison, Wisconsin 53706, United States

<sup>‡</sup>Max-Planck-Institut für Chemische Energiekonversion, Stiftstrasse 34-36, D-45470 Mülheim an der Ruhr, Germany

### Contents

|                                            |     |
|--------------------------------------------|-----|
| General Considerations                     | S2  |
| Synthesis and Characterization of <b>3</b> | S4  |
| EPR Analysis                               | S13 |
| Computational Methods                      | S18 |
| Crystallographic Data                      | S20 |
| Calculation of Kinetic Parameters          | S26 |
| Molecular Orbital Diagrams                 | S27 |
| References                                 | S30 |

## General Considerations

All operations were conducted air-free using either a Schlenk line or a nitrogen-filled glovebox unless specified otherwise.  $\text{PPh}_3$  (99%) was purchased from Sigma and recrystallized from EtOH under  $\text{N}_2$ . Solvents were distilled with appropriate drying agents ( $\text{B}_2\text{O}_3$  for  $\text{d}_6$ -acetone,  $\text{P}_2\text{O}_5$  for  $\text{d}_3$ -acetonitrile, and  $\text{CaH}_2$  for dichloromethane) and sparged with  $\text{N}_2$  prior to use.

The complex  $[(\text{Py}_5\text{Me}_2)\text{Ru}^{\text{II}}(\text{N}_3)](\text{PF}_6)$  (**2**) was synthesized according to a literature procedure.<sup>1</sup> The oxidant  $[(4\text{-BrC}_6\text{H}_4)_3\text{N}](\text{SbCl}_6)$  was purchased from Sigma-Aldrich and used as received. The oxidant  $[(4\text{-BrC}_6\text{H}_4)_3\text{N}](\text{PF}_6)$  was synthesized according to a literature procedure.<sup>2</sup> Triphenyl phosphate (>99.0%) and tris(2,4-pentanedionato)chromium(III) (>98.0%) was purchased from TCI America and used as received.

EPR spectra were obtained on a Bruker Eleksys E 500 EPR spectrometer. A continuous flow liquid helium cryostat (Oxford Instruments ESR 900) and an Oxford Instruments 3120 temperature controller were used to control the acquisition temperature. EPR simulations and double-integration were performed by using esim.SL and eview.SL, respectively (available by email from the author EB, ebill@gwdg.de). The powder pattern for  $S = 1/2$  were simulated with anisotropic  $g$  values and anisotropic line widths, using Gaussian line shapes.

NMR spectra were acquired using a Bruker Avance III 500 MHz spectrometer.  $^1\text{H}$  NMR spectra were referenced to residual solvent peaks for  $\text{CD}_2\text{HCN}$  ( $\delta = 1.94$  ppm).  $^{31}\text{P}$  NMR spectra were referenced to the corresponding  $^1\text{H}$  NMR spectra using absolute referencing.<sup>3,4</sup> Electrospray ionization (ESI) mass spectrometry data were obtained with a Thermo Q Exactive Plus mass spectrometer. UV/vis spectra were acquired on a StellarNet Miniature BLUE-Wave dip-probe spectrometer.

### Quantification Method for $^{31}\text{P}$ NMR Spectra

This procedure was adapted from the literature.<sup>5</sup> In a glovebox, a vial was loaded with 12.1 mg of  $\text{Cr}(\text{acac})_3$ , 2.9 mg of sample and 1.5 mg of  $\text{OP}(\text{OPh})_3$ . To this mixture,  $\text{CD}_3\text{CN}$  was added and the resulting solution was loaded in a screw-cap tube. The  $T_1$  inversion recovery tests typically revealed an optimal null time (d7 value) of 0.4 sec. Quantitative  $^{31}\text{P}$  spectra were therefore taken with a d1 value of 4 sec.

### Synthesis and characterization of **3**

Compound **2** (10.1 mg, 13.8 mmol) and 1.06 equivalents of the oxidant  $[(4\text{-BrC}_6\text{H}_4)_3\text{N}](\text{PF}_6)$  (9.2 mg, 15 mmol) were pre-loaded into a Schlenk flask with a stirbar in the glovebox. The flask was wrapped with aluminum foil and immersed in a dry ice-acetone bath. To this flask, 6.7 mL of cold acetone, cooled in the same bath, was added to the solid mixture via cannula and the resulting solution was allowed to stir in the dark at  $-78\text{ }^\circ\text{C}$  for 10 minutes to generate **3**. To this solution was added  $\sim 50$  mL of ether to crash out the product. The resulting purple powder was washed with  $\sim 30$  mL of ether quickly in air for subsequent MALDI-TOF and IR measurements.

Yield could not be determined because of the extreme sensitivity of the compound. However, 100% of the oxidant is consumed, as determined by the disappearance of the absorption band of the oxidant at  $\lambda \sim 700$  nm within seconds in the UV/vis spectra, used to monitor the *in situ* formation and subsequent degradation of the compound (Figure S15).

MALDI-TOF ( $m/z$ ): 545 ( $[\text{M} - 2\text{ PF}_6 - \text{N}_3]^+$ ). IR (ATR): 2005 [ $\nu(\text{N}_3)$ ], 1601, 1468, 1443, 1235, 1067, 1035, 834, 761, 652, 634  $\text{cm}^{-1}$ . UV/vis ( $\text{CH}_3\text{COCH}_3$ ):  $\lambda_{\text{max}}$  ( $\epsilon$ ) = 551 nm ( $4.1 \times 10^3\text{ mol}^{-1}\text{ L cm}^{-1}$ ). The compound was crystallized by slow diffusion of pentane into an acetone solution at  $-78\text{ }^\circ\text{C}$  for  $\sim 2$  months, followed by further diffusion at  $-25\text{ }^\circ\text{C}$  for two days. Crystallographic data collection was conducted at 100 K in the dark.

### Crystallization of **4**

Compound **3** was prepared as described above. The compound was dissolved in acetone at  $-78\text{ }^\circ\text{C}$  in the dark and layered with hexanes. Storage of the crystallization setup at  $-25\text{ }^\circ\text{C}$  for 3.5 weeks gave crystals of **4**. Attempts to deliberately synthesize **4** by reaction of  $[(\text{Py}_5\text{Me}_2)\text{Ru}^{\text{II}}(\text{Cl})](\text{PF}_6)^{1,6}$  and  $\text{AgPF}_6$  in refluxing acetone gave ESI-MS data ( $m/z = 646.0757$ ) and crystallographic data (Figure S14) that supported formation of  $[(\text{Py}_5\text{Me}_2)\text{Ru}^{\text{II}}(\text{PO}_2\text{F}_2)]^+$  as the dominant species instead of the desired product.

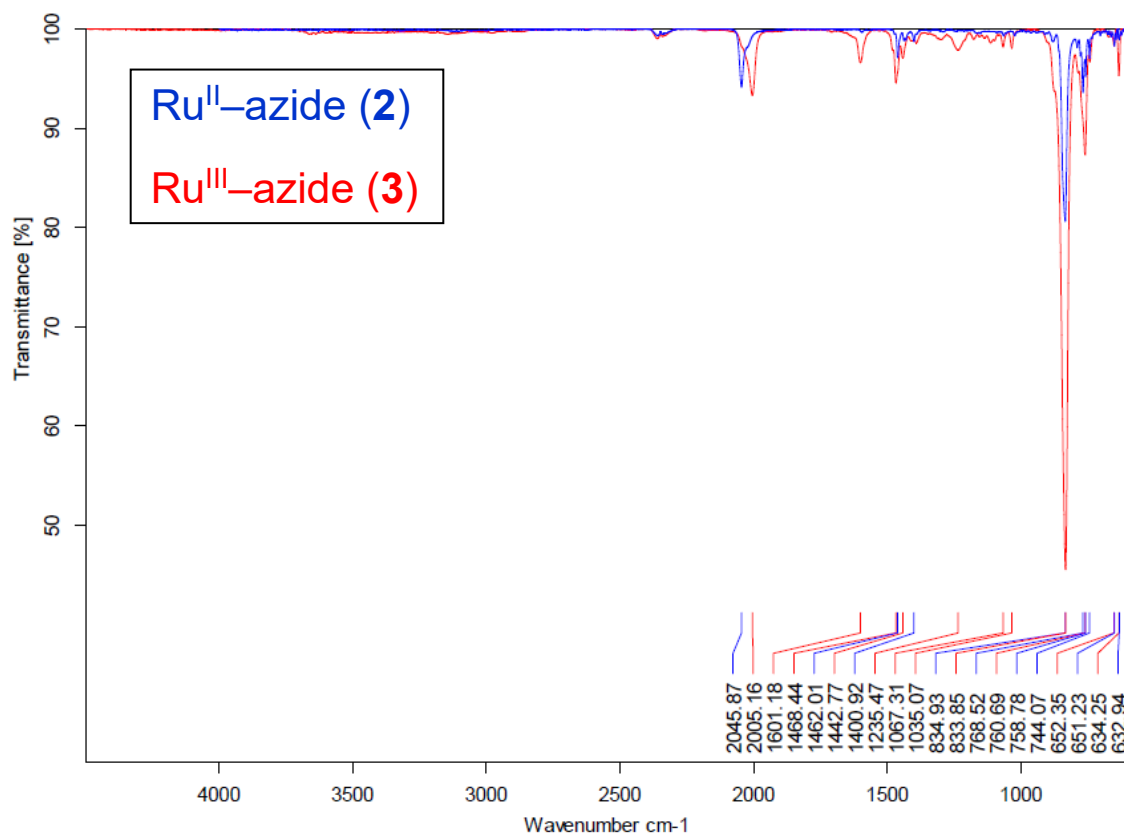

**Figure S1.** IR spectral comparisons between compounds **2** and **3**.

#### Reaction of **3** with PPh<sub>3</sub> at -78 °C

Compound **2** (11.9 mg, 16.3 mmol) and 1.00 equivalent of the oxidant [(4-BrC<sub>6</sub>H<sub>4</sub>)<sub>3</sub>N](PF<sub>6</sub>) (10.2 mg, 16.3 mmol) were pre-loaded into a Schlenk flask with a stirbar in the glovebox. The flask was wrapped with aluminum foil and immersed in a dry ice-acetone bath. To this flask, 8 mL of cold acetone, cooled in the same bath, was added to the solid mixture via cannula and the resulting solution was allowed to stir in the dark at -78 °C for 15 minutes to generate **3**. To this solution was added *dropwise* via syringe a solution of 25 equivalents of PPh<sub>3</sub> (106.5 mg, 0.4060 mol) in 7 mL acetone prepared in the glovebox. After three hours of stirring, the reaction mixture was allowed to sit at -78 °C in the dark for an additional 11 hours. To the resulting solution was added ~ 55 mL of dry ether to crash out the product. The precipitate was filtered in air and washed with additional ether. <sup>1</sup>H NMR spectroscopic analysis confirmed **2** as the only Ru product. Yield: 79%

### Generation of $[(\text{Py}_5\text{Me}_2)\text{Ru}^{\text{II}}(\text{N}(\text{H})\text{PPh}_3)]^{2+}$ (**5**)

Compound **2** (12.1 mg, 16.5 mmol) and 1.04 equivalents of the oxidant  $[(4\text{-BrC}_6\text{H}_4)_3\text{N}](\text{PF}_6)$  (10.8 mg, 17.2 mmol) were pre-loaded into a Schlenk flask with a stirbar in the glovebox. The flask was wrapped with aluminum foil and immersed in a dry ice-acetone bath. To this flask, 9 mL of cold  $\text{d}_6$ -acetone (containing a small amount of TMS), cooled in the same bath, was added to the solid mixture via cannula and the resulting solution was allowed to stir in the dark at  $-78^\circ\text{C}$  for 10 minutes to generate **3**. To this solution was added via syringe a solution of 25 equivalents of  $\text{PPh}_3$  (109.8 mg, 0.419 mol) in 3 mL of  $\text{d}_6$ -acetone prepared in the glovebox. After two hours of stirring, the cold bath was removed and the mixture was allowed to warm to room temperature whereupon the solvent was removed and the residue was washed with ether. The resulting yellow powder contained **5** (11% conversion) which was identified by its characteristic coupling between the NH H atom and the  $^{31}\text{P}$  nucleus (Figures S3 & S4) and was quantified using the  $^{31}\text{P}$  NMR method described above.

$^1\text{H}$  NMR ( $\delta$  in  $\text{CD}_3\text{CN}$ ): 9.09 (d,  $J = 5.6$  Hz, 4H), 2.75 (s, 6H), 2.52 (d,  $J_{\text{P-H}} = 5.8$  Hz, 1H) ppm. The other protons could not be assigned due to heavy overlap of peaks in the aromatic region.  $^{31}\text{P}$  NMR ( $\delta$  in  $\text{CD}_3\text{CN}$ ): 42.7 ( $J_{\text{P-H}} = 5.8$  Hz) ppm. ESI-MS:  $m/z = 411.1085$   $[\text{M} - 2 \text{PF}_6]^{2+}$ . Attempts to deliberately synthesize the phosphinimide complex via alternative routes were unsuccessful.

Other Ru products are compound **2**, compound **4**, and  $[(\text{Py}_5\text{Me}_2)\text{Ru}^{\text{II}}(\text{CD}_3\text{CN})]^{2+}$ , which are identified on the basis of the characteristic chemical shifts of their pyridine ortho-H atoms in the  $\text{Py}_5\text{Me}_2$  ligand (Figure S5). The values are  $\delta = 9.51$  ppm and 9.38 ppm for compounds **2** and  $[(\text{Py}_5\text{Me}_2)\text{Ru}^{\text{II}}(\text{CD}_3\text{CN})]^{2+}$ , respectively.<sup>1</sup> Formation of compound **4** was supported by its X-ray crystal structure determination from a separate reaction of **3'** with 1.0 equivalent of  $\text{PPh}_3$ . The pyridine ortho-H atoms of **4** appear at 9.12 ppm.

Other phosphorus products are  $[\text{H}_2\text{NPPH}_3]^+$ ,  $\text{OPPh}_3$  and  $[\text{Ph}_3\text{P}=\text{N}=\text{PPh}_3]^+$ . The ether wash contains  $\text{OPPh}_3$  with a minor unidentified phosphorus product ( $\delta = 35.4$  ppm) in the  $^{31}\text{P}$  NMR (Figure S6).

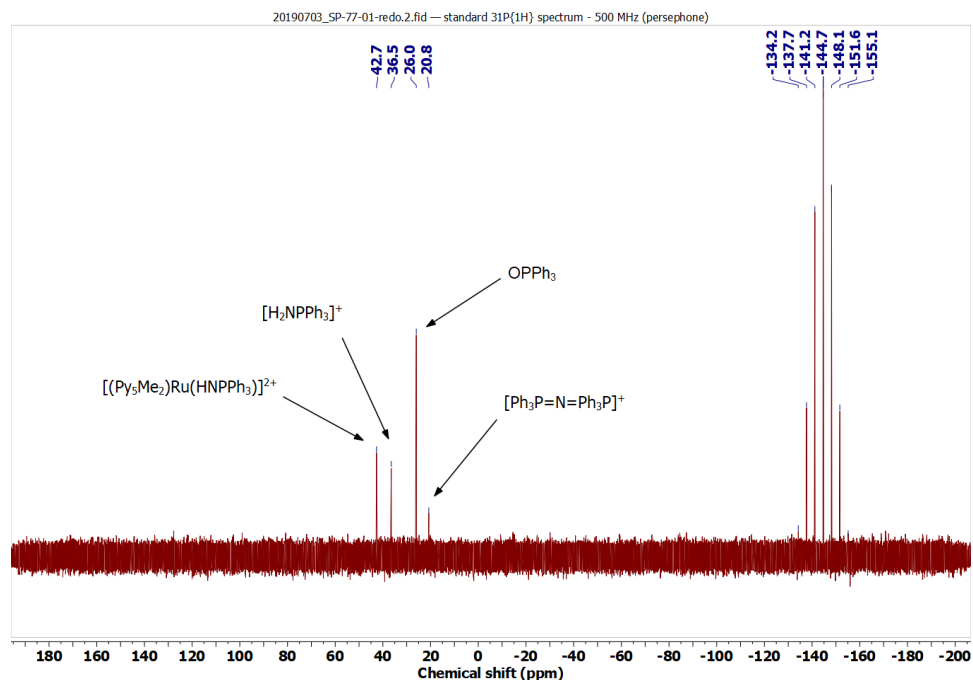

**Figure S2.**  $^{31}\text{P}$  NMR spectrum of the reaction mixture after workup.

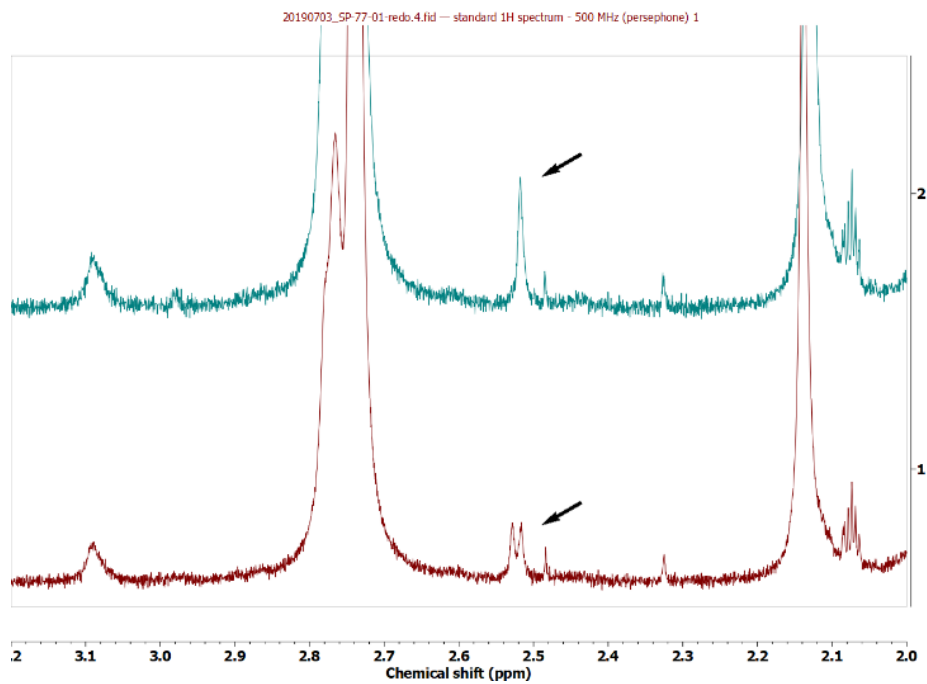

**Figure S3.**  $^{31}\text{P}$  decoupled  $^1\text{H}$  NMR spectrum (top) shown with the standard  $^1\text{H}$  ( $^{31}\text{P}$  coupled) NMR spectrum (bottom). The arrows point to the NH signal of **5**, indicating its splitting due to proximity of the  $^{31}\text{P}$  nucleus.

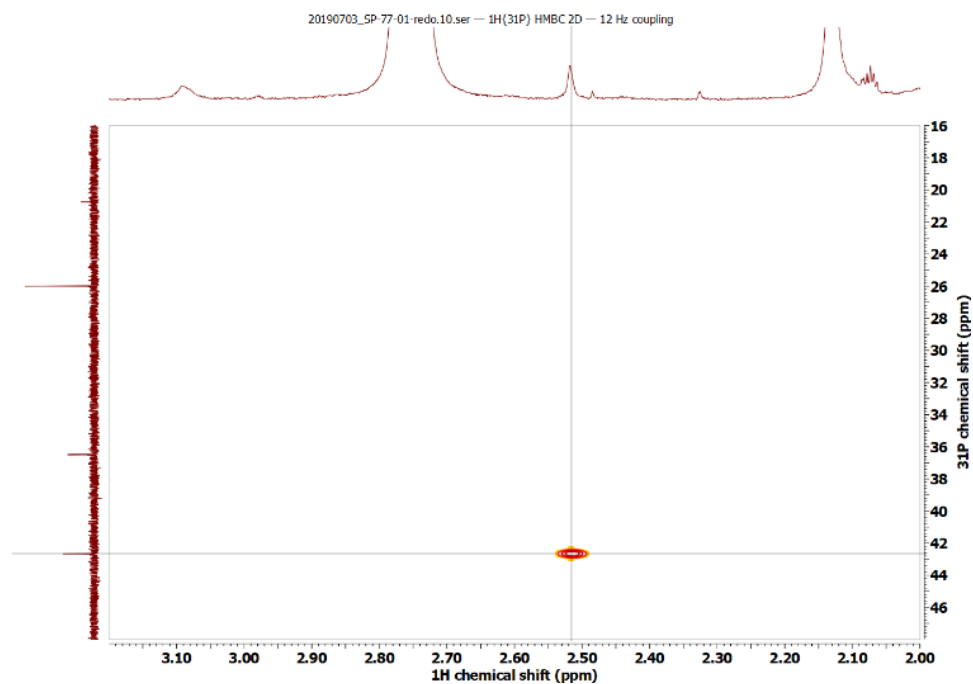

**Figure S4.** <sup>1</sup>H-<sup>31</sup>P HMBC NMR spectrum of the reaction mixture after workup with cross peak indicating the NH signal and <sup>31</sup>P signal of **5**.

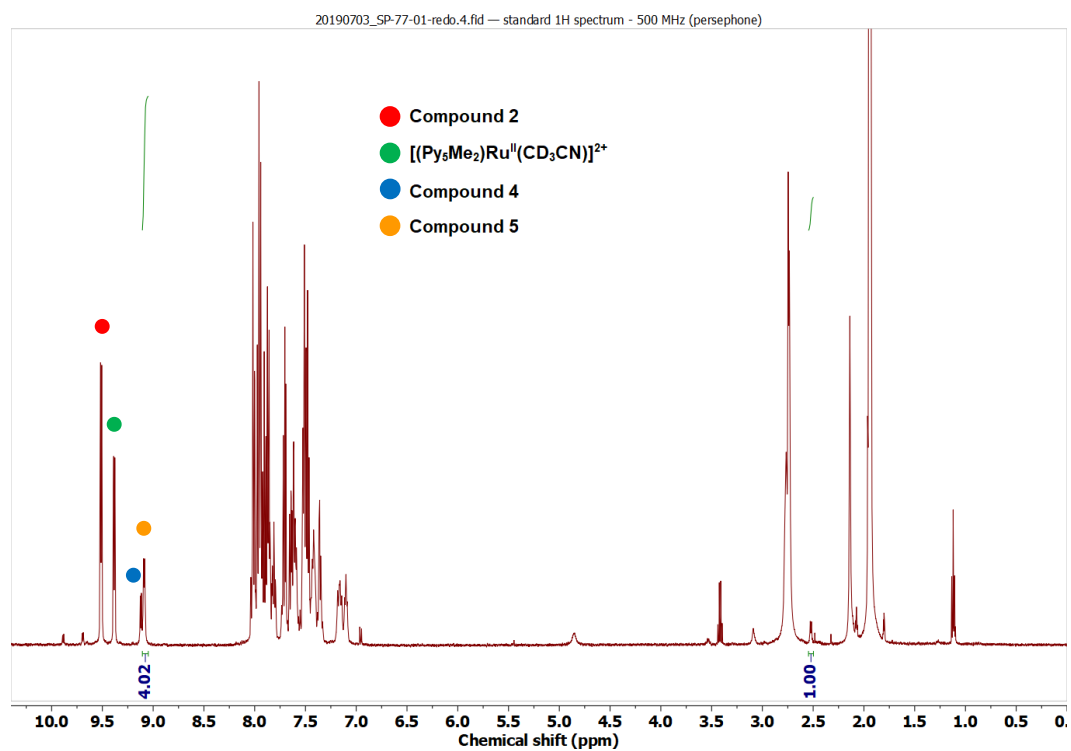

**Figure S5.** <sup>1</sup>H NMR spectrum of the reaction mixture after workup.



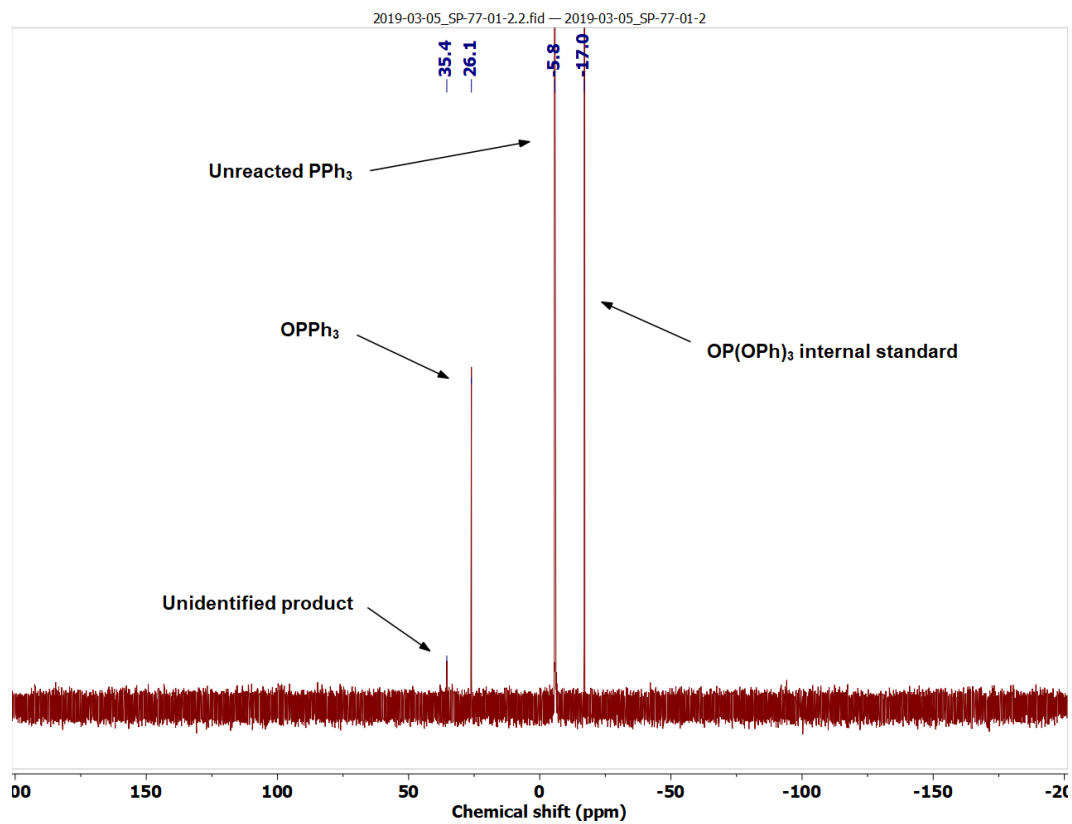

**Figure S6.**  $^{31}\text{P}$  NMR spectrum of the ether wash.

08 #111-122 RT: 0.32-0.35 AV: 3 NL: 1.30E7  
T: FTMS + p ESI Full ms [150.00-1500.00]

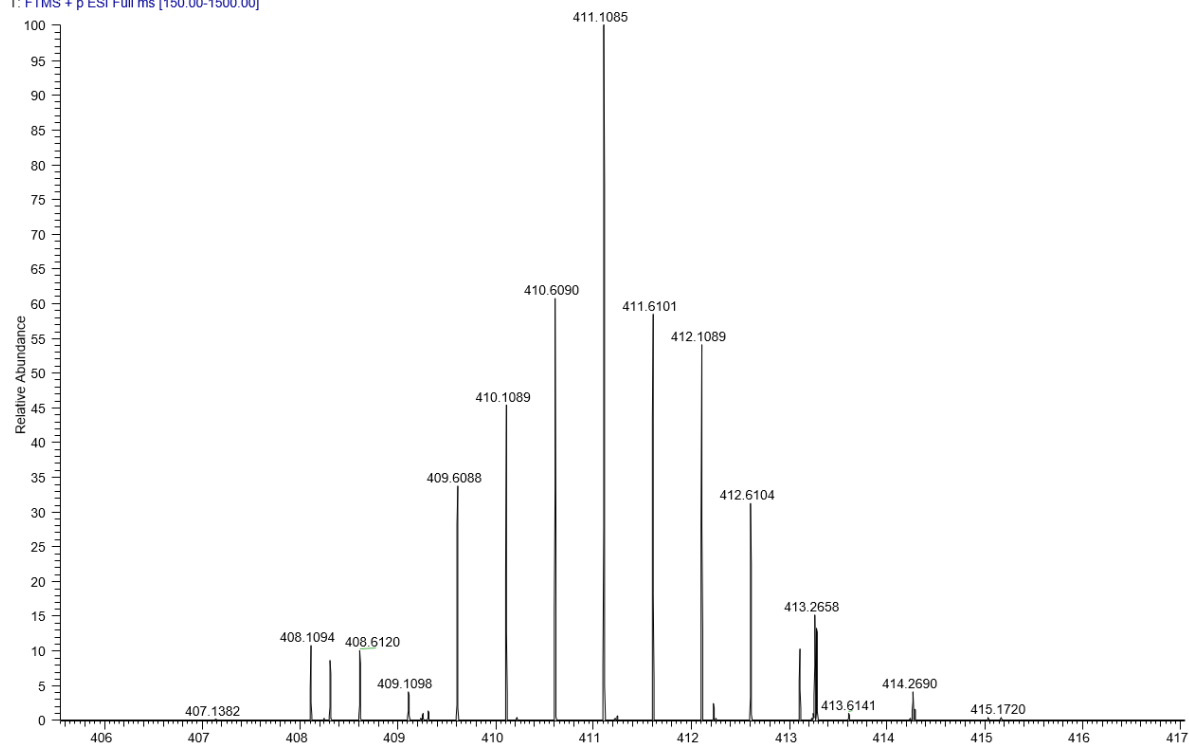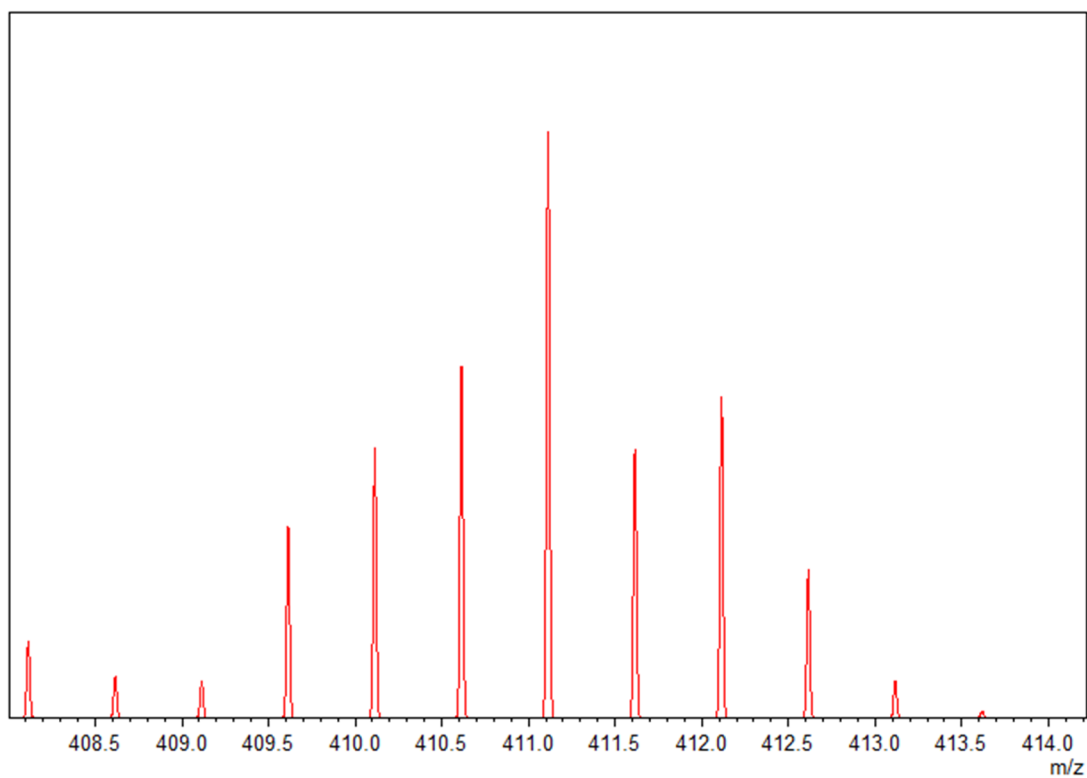

**Figure S7.** Experimental (top) and simulated (bottom) ESI-MS for **5**. Simulated m/z = 411.1088.

### NMR spectrum of the organic layer upon reaction of **3** with 1 equivalent of PPh<sub>3</sub>

Compound **5** was generated using the method described above with 1 equivalent of PPh<sub>3</sub> instead of 25 equivalents. The ether wash contains multiple phosphorus products, with a downfield shift in the <sup>31</sup>P NMR chemical shifts for OPPh<sub>3</sub> and PPh<sub>3</sub>, attributable to a proton-mediated equilibrium as described in equation 1.<sup>7</sup> OPPh<sub>3</sub> and PPh<sub>3</sub> usually appear at 26.0 ppm and -5.9 ppm; however, here they are observed at 27.3 ppm and -4.6 ppm.

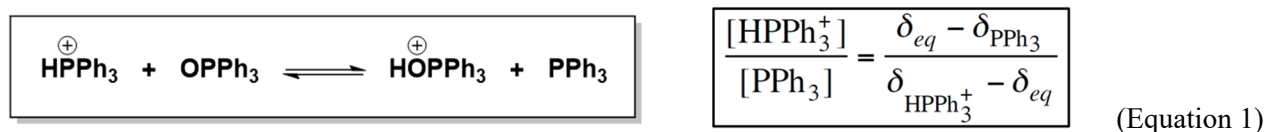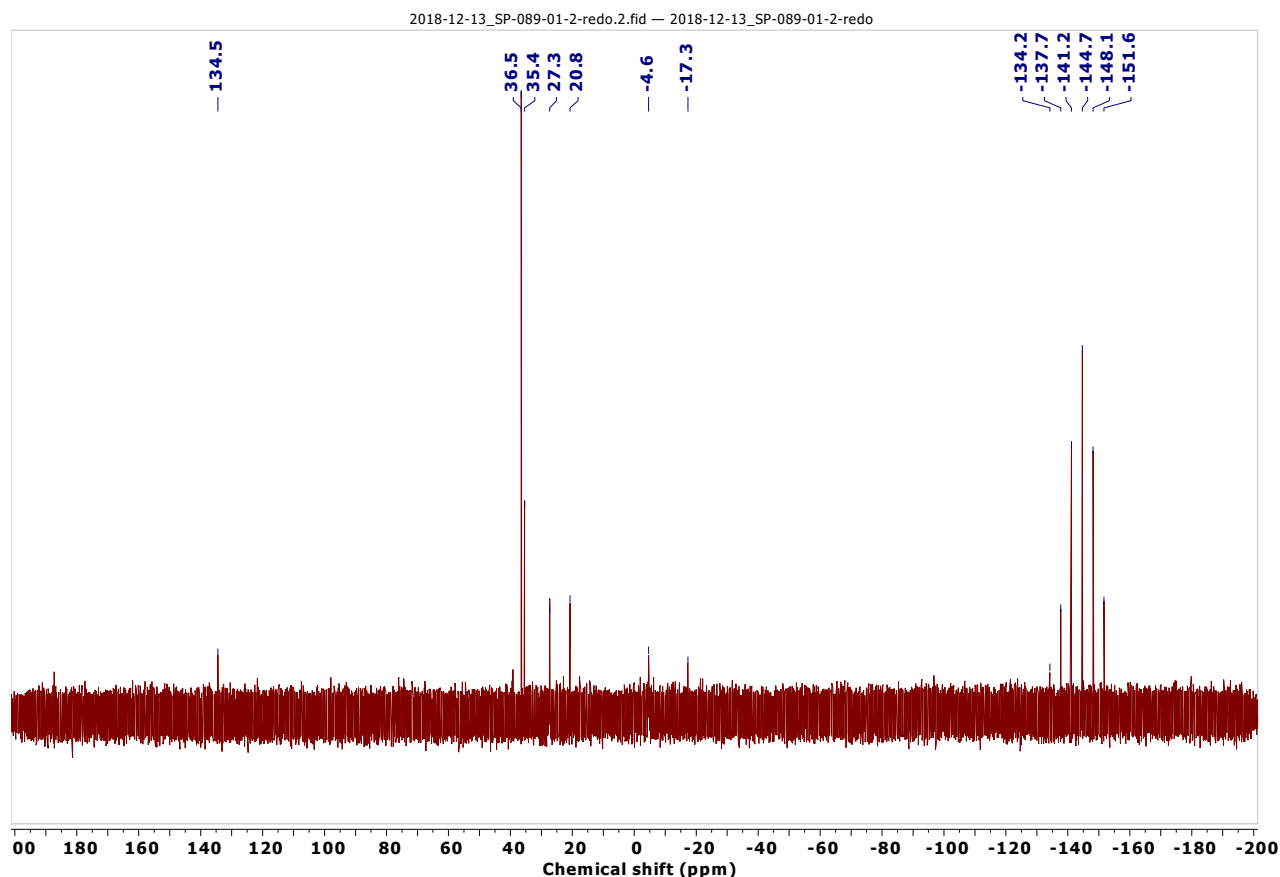

**Figure S8.** <sup>31</sup>P NMR spectrum of the ether wash.

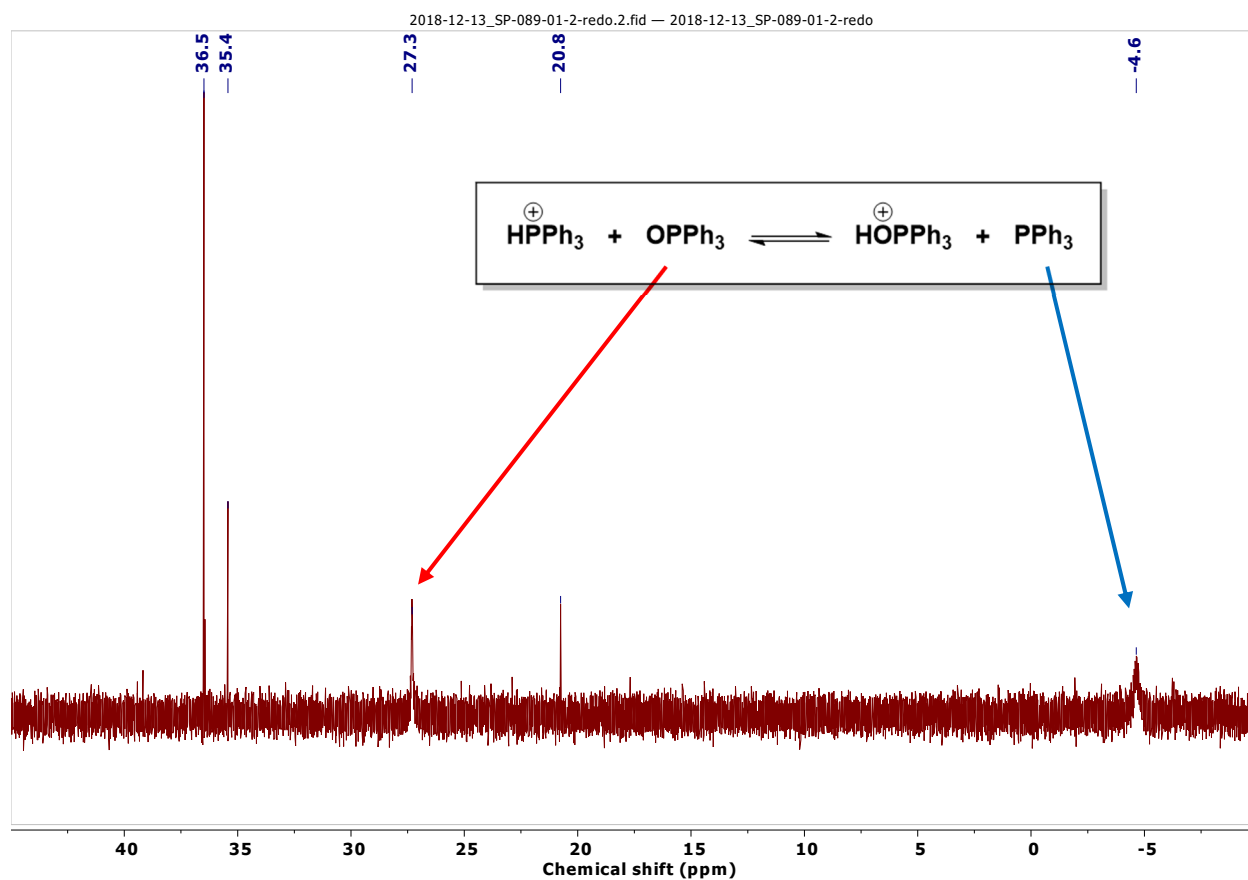

**Figure S9.** Portion of the  $^{31}\text{P}$  NMR spectrum that shows broadening and downfield shift of the peaks corresponding to  $\text{OPPh}_3$  and  $\text{PPh}_3$ . Inset shows the equilibrium attributable to this observation.

## EPR Analysis

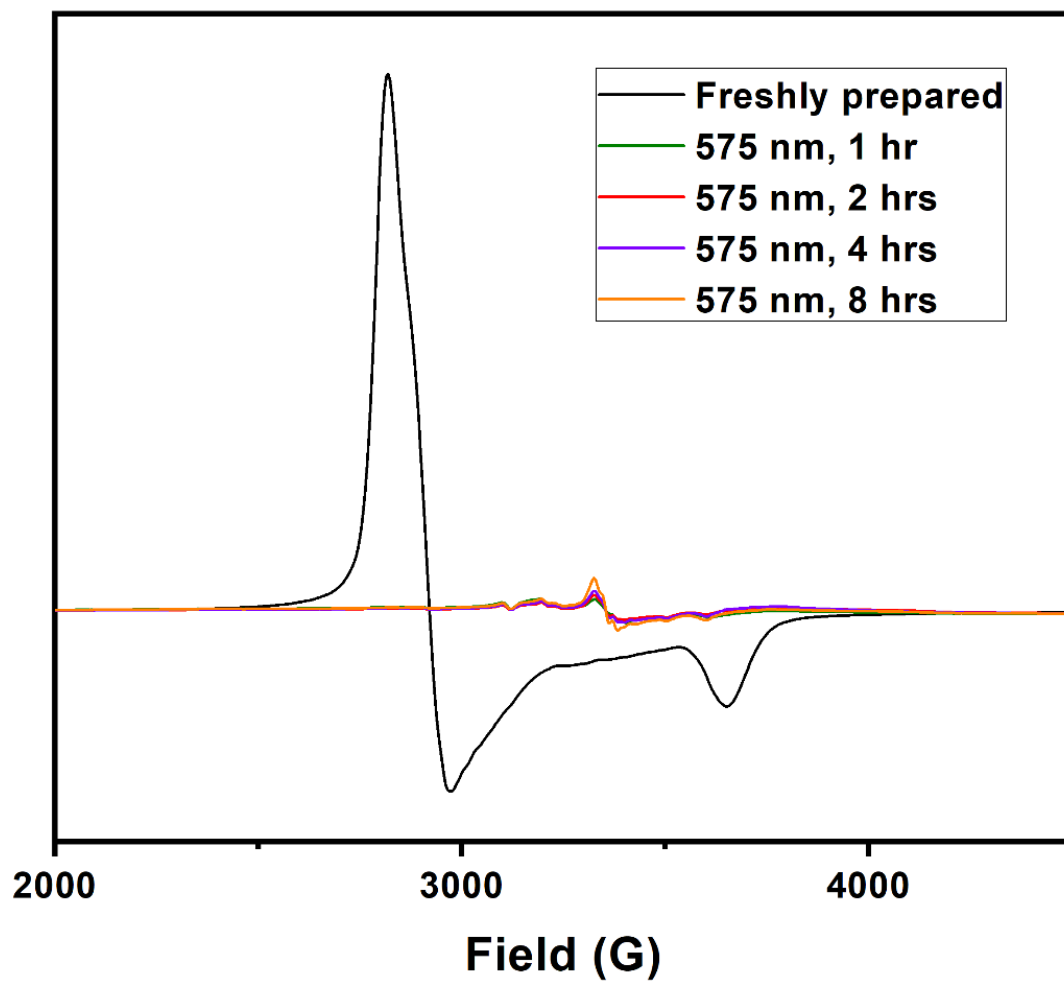

**Figure S10.** Visible light photolysis of **3'** (6.3 mM) at -196 °C monitored by EPR collected at 20 K.

# Double integration of 3'

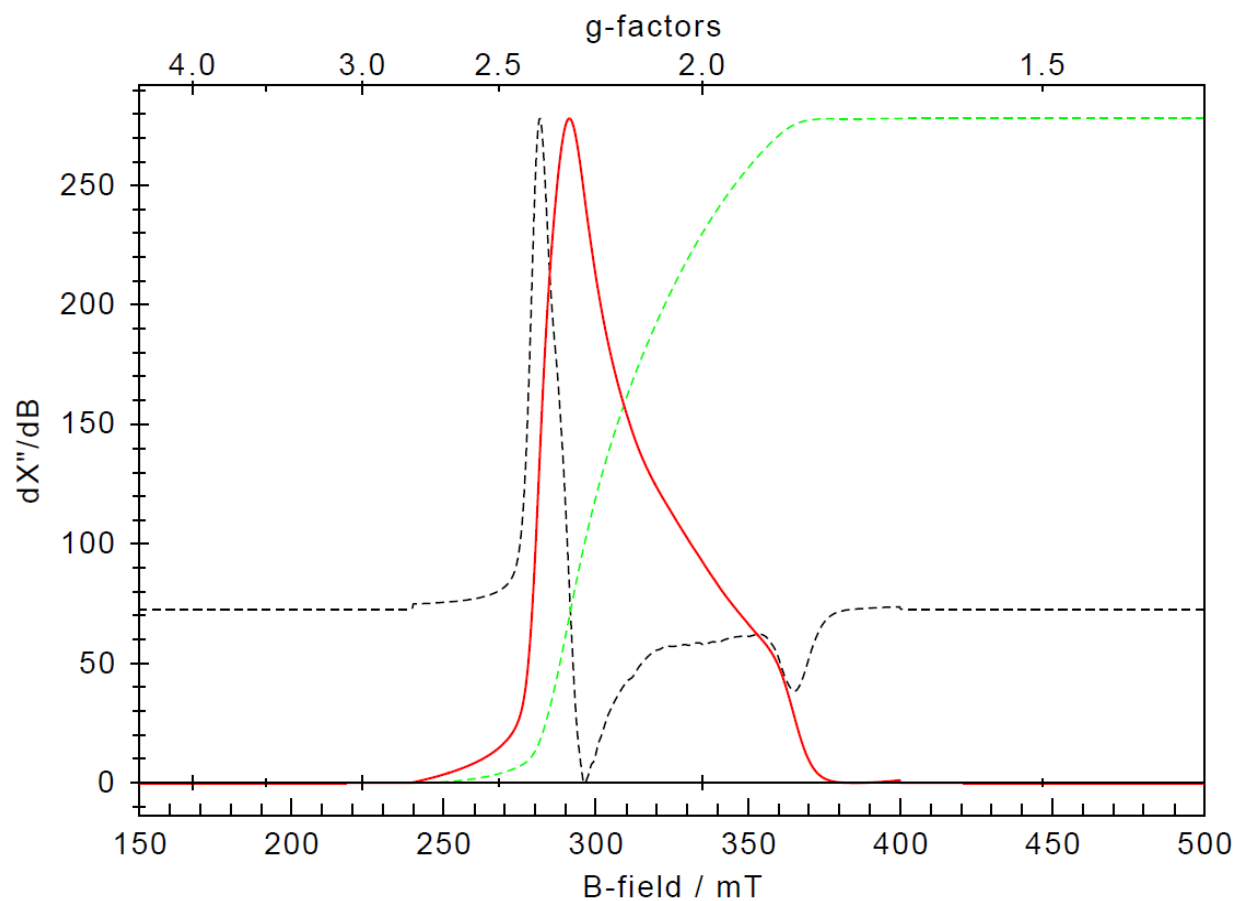

|         |     |  |                |
|---------|-----|--|----------------|
| 9.38004 | GHz |  | m.w. - freq.   |
| 1.26    | mW  |  | m.w. - power   |
| 63.10   |     |  | receiver gain  |
| 0.02    | s   |  | time constant  |
| 12.00   | G   |  | mod. amplitude |
| 100.00  | MHz |  | mod. frequency |
| 0.00    | deg |  | mod. phase     |
| 1.00    | st  |  | harmonic       |
| 3250.00 | G   |  | center field   |
| 3500.00 | G   |  | sweep          |
| 20.48   | ms  |  | ADC conv. time |
| 8.00    |     |  | number scans   |
| 1024.00 | ch  |  | nchan          |
| 0.00    |     |  | ncurve         |

double integral: 0.12017E+05

# Double integration of the product spectrum (2 hrs photolysis)

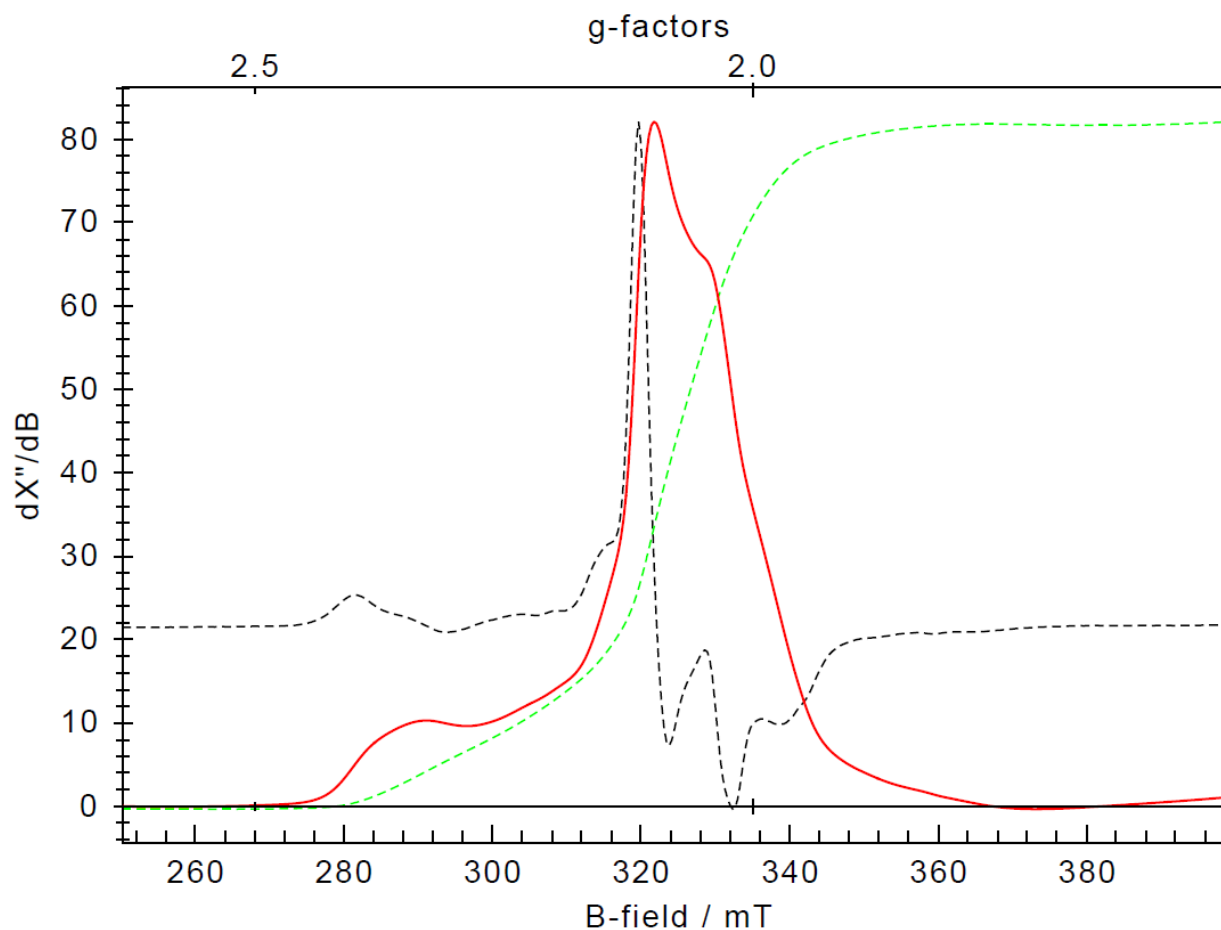

|         |     |  |                |
|---------|-----|--|----------------|
| 9.38015 | GHz |  | m.w. - freq.   |
| 1.26    | mW  |  | m.w. - power   |
| 63.10   |     |  | receiver gain  |
| 0.02    | s   |  | time constant  |
| 12.00   | G   |  | mod. amplitude |
| 100.00  | MHz |  | mod. frequency |
| 0.00    | deg |  | mod. phase     |
| 1.00    | st  |  | harmonic       |
| 3250.00 | G   |  | center field   |
| 1495.12 | G   |  | sweep          |
| 20.48   | ms  |  | ADC conv. time |
| 8.00    |     |  | number scans   |
| 438.00  | ch  |  | nchan          |
| 0.00    |     |  | ncurve         |

double integral: 0.18176E+04

# Simulation of the product spectrum (2 hrs photolysis)

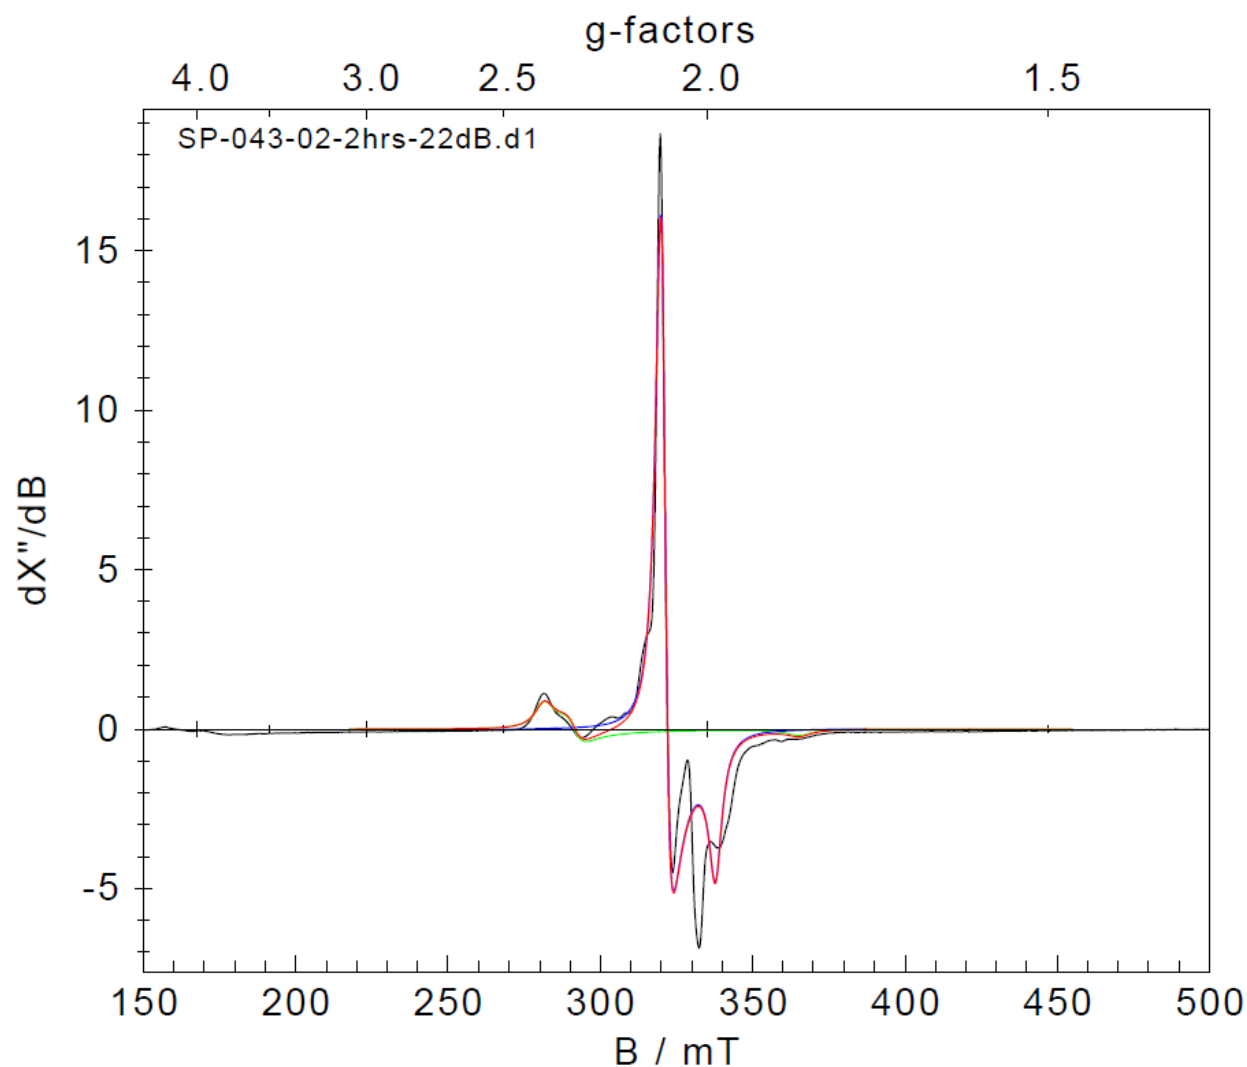

Total Int.(sim.): 0.3999E+03 B\_Int.: 0.1556E+04 fsum: 0.3002E+03

|                       |                       |
|-----------------------|-----------------------|
| 1 - AMPL 0.7085E+00 1 | 2 - AMPL 0.1837E+01 1 |
| 1 gx 2.3803 0         | 1 gx 2.0899 1         |
| 2 gy 2.2985 0         | 2 gy 2.0900 1         |
| 3 gz 1.8348 0         | 3 gz 1.9838 1         |
| 4 W_f 5.1000 0        | 4 W_f 2.9677 1        |
| 5 Wx 0.0000 0         | 5 Wx 0.0000 0         |
| 6 Wy 0.0000 0         | 6 Wy 0.0000 0         |
| 7 Wz 0.0000 0         | 7 Wz 0.0000 0         |
| 8 V_x 0.0000 0        | 8 V_x 0.0000 0        |
| 9 V_y 0.0000 0        | 9 V_y 0.0000 0        |
| 10 V_z 0.0000 0       | 10 V_z 0.0000 0       |
| Intens.: 0.1113E+03   | Intens.: 0.2886E+03   |
| [%]: 27.8             | [%]: 72.2             |
| S_Integ: 0.4851E+03   | S_Integ: 0.1186E+04   |
| B_Integ: 0.4517E+03   | B_Integ: 0.1104E+04   |

units D/J: cm-1; A1/wf/c1/c2: 10^-4 cm-1; widths Wi: mT



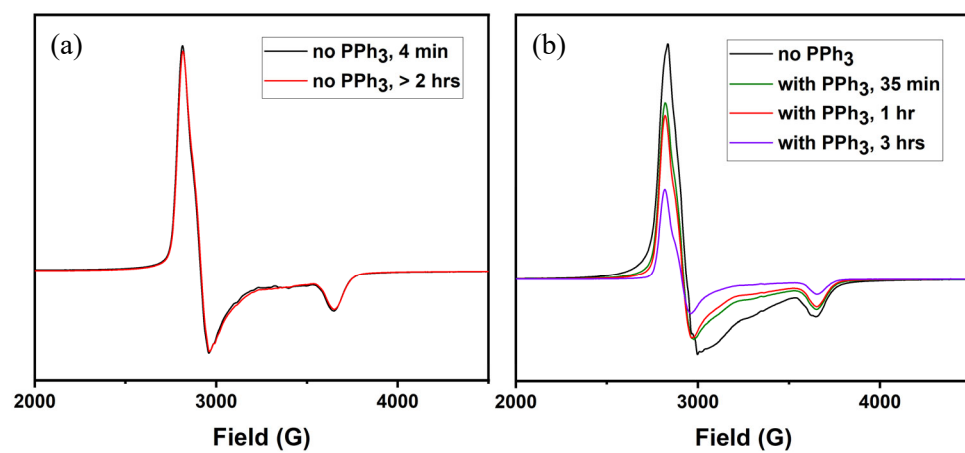

**Figure S11.** (a) Minimal decomposition of **3'** without PPh<sub>3</sub>. (b) Decomposition of **3** in the presence of 1 equivalent of PPh<sub>3</sub>.

## Computational Methods

Computations were performed using the Orca software package version 4.1.1.<sup>8</sup> For all calculations, the def2-SVP basis set was used for all atoms except for the Ru atom, for which the def2-TZVPP basis set was applied.<sup>9</sup> Dispersion correction (D3)<sup>10,11</sup> and the relativistic approximation (ZORA) were used as well.

Geometry optimizations and frequency calculations were conducted with the BP86 functional along with the RI approximation and the SARC/J auxiliary basis set.<sup>12</sup>

The geometry optimizations for the  $[(\text{Py}_5\text{Me}_2)\text{Ru}^{\text{II}}(\text{N}_3)]^+$  (**2**) and  $[(\text{Py}_5\text{Me}_2)\text{Ru}^{\text{III}}(\text{N}_3)]^{2+}$  (**3**) cations were conducted with the crystal structures as inputs.<sup>1</sup> The crystal structure of  $[(14\text{-TMC})\text{Ru}^{\text{III}}(\text{N}_3)_2]^+$  (**1**) is not reported, so its closest structural analogue  $[(14\text{-TMC})\text{Ru}^{\text{II}}(\text{MeCN})(\text{N}_3)]^+$  was used as the starting point for the geometry optimization with the carbon atoms in the acetonitrile ligand replaced with nitrogen atoms.

Transition state searches for the azide-to-nitride transformation of **3** and  $\text{PPh}_3$  coordination to **3** were conducted with the aid of relaxed surfaced scans with the N–N bond distance being scanned from 1.0 Å to 4.0 Å or the P–N bond distance being scanned from 4.0 Å to 1.0 Å in  $\sim 0.05$  Å increments with the DFT-optimized geometries used as inputs. For the relaxed surfaced scans, convergence was aided with the SlowConv keyword and the tolerance was readjusted with TolE 1e-7 and TolErr 1e-6. The structures at the local energy maxima along these surfaces were subsequently used as inputs for transition state optimization. Frequency calculations were conducted on all optimized transition state geometries to confirm the existence of a single imaginary vibrational frequency. Inspection of these imaginary modes confirmed that the computed transition states connect two distinct intermediates along the reaction coordinate.

Initial input geometries for the proposed nitrido compounds were attained by eliminating the two distal nitrogen atoms in the azide ligand from the benchmark crystal structures mentioned above. These structures were then subjected to geometry optimization.

Single point calculations for MO diagrams were conducted using the B3LYP functional<sup>13</sup> along with the RIJCOSX approximation and the SARC/J and def2-SVP/C auxiliary basis sets.<sup>14</sup>

Single point calculations for reaction energy profiles and Löwdin spin populations were conducted with the  $\omega$ B97X-D3 functional<sup>15,16</sup> along with the RIJONX approximation and the SARC/J auxiliary basis set. Solvation effects were modeled using CPCM(acetone) for all the (Py<sub>5</sub>Me<sub>2</sub>)Ru compounds and CPCM(acetonitrile) for all the (14-TMC)Ru compounds.

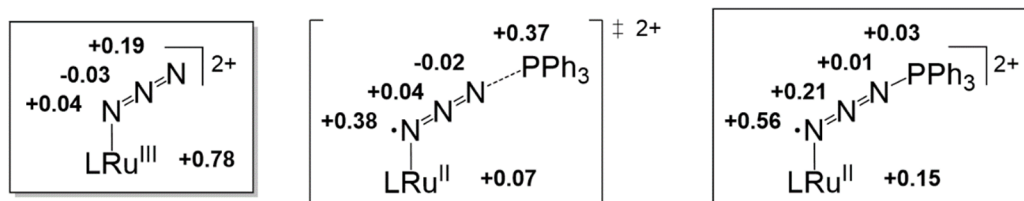

**Figure S12.** Löwdin spin populations of **3**, the transition state for coordination of PPh<sub>3</sub> to **3**, and the [Ru–N=N=N–PPh<sub>3</sub>] intermediate.

## Crystallographic Data

The structure for compound **3** • CH<sub>3</sub>COCH<sub>3</sub> was processed as a two-component non-merohedral twin with a 20.3(2)% second component contribution. The twin components are related by a 179.6° rotation about the reciprocal axis [0 0 1]. The asymmetric unit consists of two [(Py<sub>5</sub>Me<sub>2</sub>)Ru<sup>III</sup>(N<sub>3</sub>)]<sup>2+</sup> cations, four hexafluorophosphate counteranions and two acetone molecules. The O1-acetone is disordered over two positions with a major component contribution of 81(6)%. The disordered atoms were refined with similarity restraints.

For [(Py<sub>5</sub>Me<sub>2</sub>)Ru<sup>II</sup>(Cl)](SbCl<sub>6</sub>)<sub>0.70</sub>(SbCl<sub>4</sub>)<sub>0.30</sub> • 2 CH<sub>3</sub>COCH<sub>3</sub>, the asymmetric unit consists of one half of a [(Py<sub>5</sub>Me<sub>2</sub>)Ru<sup>II</sup>(Cl)]<sup>+</sup> cation, one half of a disordered antimonate anion that is 69.5% in the SbCl<sub>6</sub><sup>−</sup> form and 30.5% in the SbCl<sub>4</sub><sup>−</sup> form, one half of O1-acetone and one half of a disordered O2-acetone. The ruthenium complex, antimonate anion and acetone molecules all reside on a crystallographic mirror plane. The disordered atoms were refined with similarity restraints and constraints.

The asymmetric unit of [(Py<sub>5</sub>Me<sub>2</sub>)Ru<sup>II</sup>(PO<sub>2</sub>F<sub>2</sub>)](PO<sub>2</sub>F<sub>2</sub>)<sub>0.84</sub>(PF<sub>6</sub>)<sub>0.16</sub> • 0.5 CH<sub>3</sub>COCH<sub>3</sub> consists of two [(Py<sub>5</sub>Me<sub>2</sub>)Ru<sup>II</sup>(PO<sub>2</sub>F<sub>2</sub>)]<sup>+</sup> cations, two phosphorus-containing counteranions partially in PO<sub>2</sub>F<sub>2</sub><sup>−</sup> form and partially in PF<sub>6</sub><sup>−</sup> form, and one acetone molecule. The PO<sub>2</sub>F<sub>2</sub><sup>−</sup> ligand is disordered over two positions in each [(Py<sub>5</sub>Me<sub>2</sub>)Ru<sup>II</sup>(PO<sub>2</sub>F<sub>2</sub>)]<sup>+</sup> cation, with a major component contribution of 60(2)% and 61(1)%, respectively. The PO<sub>2</sub>F<sub>2</sub><sup>−</sup> counteranion is disordered over three positions with occupancies of 66.9(3)%, 59.8(3)% and 40.7(3)%, respectively. The PF<sub>6</sub><sup>−</sup> counteranion is disordered over two positions with occupancies of 37.4(3)% and 27.8(3)%, respectively. The PF<sub>6</sub><sup>−</sup> counteranion resides on a crystallographic inversion center, and only a half of it is present in the asymmetric unit. The acetone molecule is disordered over four positions with occupancies of 38.7(3)%, 26.1(3)%, 22.6(3)% and 12.7(3)%, respectively. The disordered atoms were refined with similarity restraints and constraints. A CSD survey was conducted to input restraints of 1.465 Å for P–O bond lengths and 1.527 Å for P–F bond lengths in the disordered PO<sub>2</sub>F<sub>2</sub><sup>−</sup> counteranions. The acetone molecules were modeled using an idealized geometry.<sup>17</sup>

|                                                |                                                                                                                            |                                                                                                                                           |
|------------------------------------------------|----------------------------------------------------------------------------------------------------------------------------|-------------------------------------------------------------------------------------------------------------------------------------------|
| Compound                                       | $[(\text{Py}_5\text{Me}_2)\text{Ru}^{\text{III}}(\text{N}_3)](\text{PF}_6)_2$ ( <b>3</b> )<br>• $\text{CH}_3\text{COCH}_3$ | $[(\text{Py}_5\text{Me}_2)\text{Ru}^{\text{II}}(\text{CH}_3\text{COCH}_3)](\text{PF}_6)_2$ ( <b>4</b> )<br>• 2 $\text{CH}_3\text{COCH}_3$ |
| Empirical formula                              | $\text{C}_{32}\text{H}_{31}\text{F}_{12}\text{N}_8\text{OP}_2\text{Ru}$                                                    | $\text{C}_{38}\text{H}_{43}\text{F}_{12}\text{N}_5\text{O}_3\text{P}_2\text{Ru}$                                                          |
| Formula weight                                 | 934.66                                                                                                                     | 1008.78                                                                                                                                   |
| Temperature/K                                  | 100.0                                                                                                                      | 99.98                                                                                                                                     |
| Crystal system                                 | triclinic                                                                                                                  | triclinic                                                                                                                                 |
| Space group                                    | $P\bar{1}$                                                                                                                 | $P\bar{1}$                                                                                                                                |
| a/Å                                            | 15.546(4)                                                                                                                  | 12.725(4)                                                                                                                                 |
| b/Å                                            | 15.734(2)                                                                                                                  | 12.889(4)                                                                                                                                 |
| c/Å                                            | 16.911(2)                                                                                                                  | 15.603(5)                                                                                                                                 |
| $\alpha/^\circ$                                | 99.81(1)                                                                                                                   | 113.14(1)                                                                                                                                 |
| $\beta/^\circ$                                 | 116.88(1)                                                                                                                  | 91.77(2)                                                                                                                                  |
| $\gamma/^\circ$                                | 96.32(1)                                                                                                                   | 117.69(1)                                                                                                                                 |
| Volume/Å <sup>3</sup>                          | 3552(1)                                                                                                                    | 2010(1)                                                                                                                                   |
| Z                                              | 4                                                                                                                          | 2                                                                                                                                         |
| $\rho_{\text{calc}}/\text{g cm}^{-3}$          | 1.748                                                                                                                      | 1.666                                                                                                                                     |
| $\mu/\text{mm}^{-1}$                           | 0.637                                                                                                                      | 0.571                                                                                                                                     |
| F(000)                                         | 1876.0                                                                                                                     | 1024.0                                                                                                                                    |
| Crystal size/mm <sup>3</sup>                   | $0.213 \times 0.033 \times 0.017$                                                                                          | $0.098 \times 0.091 \times 0.05$                                                                                                          |
| Radiation                                      | MoK $\alpha$ ( $\lambda = 0.71073$ )                                                                                       | MoK $\alpha$ ( $\lambda = 0.71073$ )                                                                                                      |
| 2 $\theta$ range for data collection/ $^\circ$ | 2.688 to 52.97                                                                                                             | 2.942 to 56.672                                                                                                                           |
| Index ranges                                   | $-19 \leq h \leq 16, -19 \leq k \leq 19,$<br>$0 \leq l \leq 21$                                                            | $-16 \leq h \leq 16, -17 \leq k \leq 17,$<br>$-20 \leq l \leq 20$                                                                         |
| Reflections collected                          | 14615                                                                                                                      | 50307                                                                                                                                     |
| Independent reflections                        | 14615 [ $R_{\text{int}} = 0.1296,$<br>$R_{\text{sigma}} = 0.1386$ ]                                                        | 9994 [ $R_{\text{int}} = 0.0410,$<br>$R_{\text{sigma}} = 0.0383$ ]                                                                        |
| Data/restraints/parameters                     | 14615/46/1032                                                                                                              | 9994/7/558                                                                                                                                |
| Goodness-of-fit on F <sup>2</sup>              | 1.043                                                                                                                      | 1.127                                                                                                                                     |
| Final R indexes [ $I \geq 2\sigma(I)$ ]        | $R_1 = 0.0667, wR_2 = 0.1234$                                                                                              | $R_1 = 0.0333, wR_2 = 0.0896$                                                                                                             |
| Final R indexes [all data]                     | $R_1 = 0.1368, wR_2 = 0.1499$                                                                                              | $R_1 = 0.0436, wR_2 = 0.0921$                                                                                                             |
| Largest diff. peak/hole / e Å <sup>-3</sup>    | 1.18/-1.13                                                                                                                 | 0.69/-0.69                                                                                                                                |

$R_1 = \sum ||F_{\text{obs}}| - |F_{\text{calc}}|| / \sum |F_{\text{obs}}|$  and  $wR_2 = [\sum w[F_{\text{obs}}^2 - F_{\text{calc}}^2]^2 / \sum w[F_{\text{obs}}^2]^2]^{1/2}$   
 $w = 1 / [\sigma^2(F_{\text{obs}}^2) + (aP)^2 + bP]$ , where P is  $[2F_{\text{calc}}^2 + \text{Max}(F_{\text{obs}}^2, 0)] / 3$   
 $\text{GoF} = [\sum w[F_{\text{obs}}^2 - F_{\text{calc}}^2]^2 / (n-p)]^{1/2}$  (n = number of measured intensities, p = number of parameters)

| Compound                                       | $[(\text{Py}_5\text{Me}_2)\text{Ru}^{\text{II}}(\text{Cl})](\text{SbCl}_6)_{0.70}(\text{SbCl}_4)_{0.30}$<br>• 2 $\text{CH}_3\text{COCH}_3$ | $[(\text{Py}_5\text{Me}_2)\text{Ru}^{\text{II}}(\text{Cl})](\text{PF}_6)$<br>• $\text{CH}_3\text{COCH}_3$ | $[(\text{Py}_5\text{Me}_2)\text{Ru}^{\text{II}}(\text{PO}_2\text{F}_2)](\text{PO}_2\text{F}_2)_{0.84}(\text{PF}_6)_{0.16}$<br>• 0.5 $\text{CH}_3\text{COCH}_3$ |
|------------------------------------------------|--------------------------------------------------------------------------------------------------------------------------------------------|-----------------------------------------------------------------------------------------------------------|----------------------------------------------------------------------------------------------------------------------------------------------------------------|
| Empirical formula                              | $\text{C}_{35}\text{H}_{37}\text{Cl}_{6.39}\text{N}_5\text{O}_2\text{RuSb}$                                                                | $\text{C}_{32}\text{H}_{31}\text{ClF}_6\text{N}_5\text{OPRu}$                                             | $\text{C}_{30.5}\text{H}_{28}\text{F}_{4.65}\text{N}_5\text{O}_{4.17}\text{P}_2\text{Ru}$                                                                      |
| Formula weight                                 | 1009.04                                                                                                                                    | 783.11                                                                                                    | 782.78                                                                                                                                                         |
| Temperature/K                                  | 100.0                                                                                                                                      | 99.99                                                                                                     | 100.0                                                                                                                                                          |
| Crystal system                                 | orthorhombic                                                                                                                               | orthorhombic                                                                                              | triclinic                                                                                                                                                      |
| Space group                                    | <i>Pnma</i>                                                                                                                                | <i>Pmc2</i> <sub>1</sub>                                                                                  | <i>P</i> $\bar{1}$                                                                                                                                             |
| a/Å                                            | 23.348(7)                                                                                                                                  | 10.366(3)                                                                                                 | 11.390(4)                                                                                                                                                      |
| b/Å                                            | 13.355(4)                                                                                                                                  | 8.964(3)                                                                                                  | 16.353(5)                                                                                                                                                      |
| c/Å                                            | 12.292(4)                                                                                                                                  | 17.126(6)                                                                                                 | 20.162(6)                                                                                                                                                      |
| $\alpha/^\circ$                                | 90                                                                                                                                         | 90                                                                                                        | 99.44(1)                                                                                                                                                       |
| $\beta/^\circ$                                 | 90                                                                                                                                         | 90                                                                                                        | 94.92(1)                                                                                                                                                       |
| $\gamma/^\circ$                                | 90                                                                                                                                         | 90                                                                                                        | 109.59(2)                                                                                                                                                      |
| Volume/Å <sup>3</sup>                          | 3833(2)                                                                                                                                    | 1591.3(9)                                                                                                 | 3450(2)                                                                                                                                                        |
| Z                                              | 4                                                                                                                                          | 2                                                                                                         | 4                                                                                                                                                              |
| $\rho_{\text{calc}}/\text{g cm}^{-3}$          | 1.749                                                                                                                                      | 1.634                                                                                                     | 1.507                                                                                                                                                          |
| $\mu/\text{mm}^{-1}$                           | 1.584                                                                                                                                      | 0.698                                                                                                     | 0.615                                                                                                                                                          |
| F(000)                                         | 2007.0                                                                                                                                     | 792.0                                                                                                     | 1581.0                                                                                                                                                         |
| Crystal size/mm <sup>3</sup>                   | $0.085 \times 0.072 \times 0.061$                                                                                                          | $0.083 \times 0.06 \times 0.016$                                                                          | $0.089 \times 0.055 \times 0.024$                                                                                                                              |
| Radiation                                      | MoK $\alpha$ ( $\lambda = 0.71073$ )                                                                                                       | MoK $\alpha$ ( $\lambda = 0.71073$ )                                                                      | MoK $\alpha$ ( $\lambda = 0.71073$ )                                                                                                                           |
| 2 $\theta$ range for data collection/ $^\circ$ | 3.488 to 54.3                                                                                                                              | 3.93 to 54.26                                                                                             | 2.072 to 52.834                                                                                                                                                |
| Index ranges                                   | $-29 \leq h \leq 29, -17 \leq k \leq 17, -15 \leq l \leq 15$                                                                               | $-13 \leq h \leq 13, -11 \leq k \leq 11, -21 \leq l \leq 21$                                              | $-14 \leq h \leq 14, -20 \leq k \leq 20, -25 \leq l \leq 25$                                                                                                   |
| Reflections collected                          | 70231                                                                                                                                      | 29870                                                                                                     | 74964                                                                                                                                                          |
| Independent reflections                        | 4428 [ $R_{\text{int}} = 0.0485$ , $R_{\text{sigma}} = 0.0183$ ]                                                                           | 3704 [ $R_{\text{int}} = 0.0451$ , $R_{\text{sigma}} = 0.0253$ ]                                          | 14156 [ $R_{\text{int}} = 0.1337$ , $R_{\text{sigma}} = 0.1126$ ]                                                                                              |
| Data/restraints/parameters                     | 4428/67/339                                                                                                                                | 3704/35/255                                                                                               | 14156/366/1084                                                                                                                                                 |
| Goodness-of-fit on F <sup>2</sup>              | 1.159                                                                                                                                      | 1.064                                                                                                     | 1.043                                                                                                                                                          |
| Final R indexes [ $I \geq 2\sigma(I)$ ]        | $R_1 = 0.0410, wR_2 = 0.0919$                                                                                                              | $R_1 = 0.0237, wR_2 = 0.0575$                                                                             | $R_1 = 0.0882, wR_2 = 0.2513$                                                                                                                                  |
| Final R indexes [all data]                     | $R_1 = 0.0480, wR_2 = 0.0955$                                                                                                              | $R_1 = 0.0252, wR_2 = 0.0584$                                                                             | $R_1 = 0.1633, wR_2 = 0.3014$                                                                                                                                  |
| Largest diff. peak/hole / e Å <sup>-3</sup>    | 1.29/-1.29                                                                                                                                 | 0.72/-0.34                                                                                                | 1.81/-0.85                                                                                                                                                     |
| Flack parameter                                | -                                                                                                                                          | 0.005(12)                                                                                                 | -                                                                                                                                                              |

$$R_1 = \sum ||F_{\text{obs}}| - |F_{\text{calc}}|| / \sum |F_{\text{obs}}| \text{ and } wR_2 = [\sum w[F_{\text{obs}}^2 - F_{\text{calc}}^2]^2 / \sum w[F_{\text{obs}}^2]^2]^{1/2}$$

$$w = 1 / [\sigma^2(F_{\text{obs}}^2) + (aP)^2 + bP], \text{ where } P \text{ is } [2F_{\text{calc}}^2 + \text{Max}(F_{\text{obs}}^2, 0)] / 3$$

$$\text{GoF} = [\sum w[F_{\text{obs}}^2 - F_{\text{calc}}^2]^2 / (n-p)]^{1/2} \text{ (n = number of measured intensities, p = number of parameters)}$$

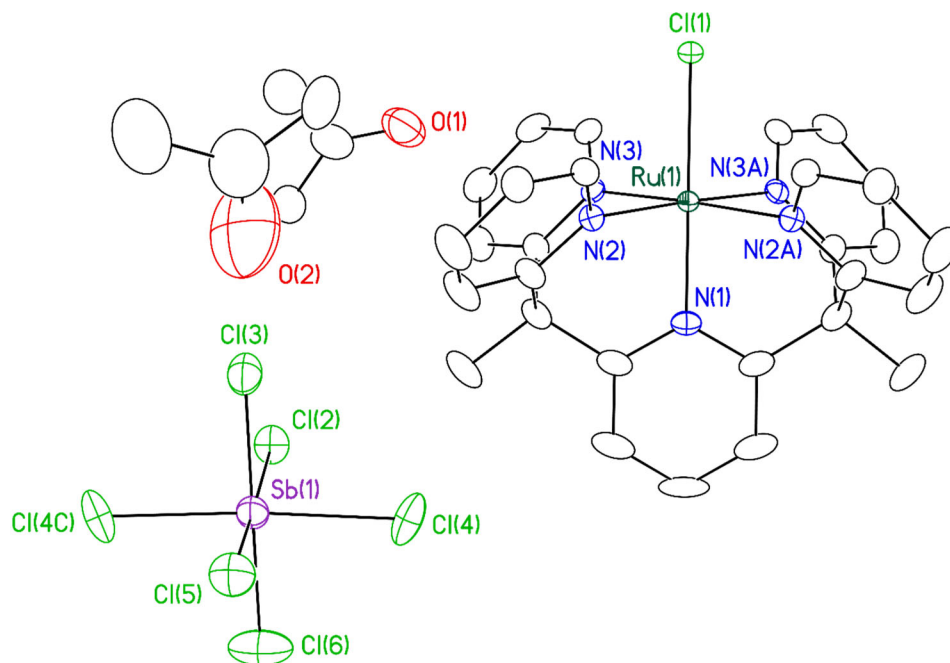

**Figure S13.** A molecular drawing of  $[(\text{Py}_5\text{Me}_2)\text{Ru}^{\text{II}}(\text{Cl})](\text{SbCl}_6)_{0.70}(\text{SbCl}_4)_{0.30} \cdot 2 \text{CH}_3\text{COCH}_3$  shown with 50% probability ellipsoids. Only the major component (the  $\text{SbCl}_6^-$  form) of the disordered antimonate anion and only the major component of the disordered O2-acetone are shown. All H atoms are omitted.

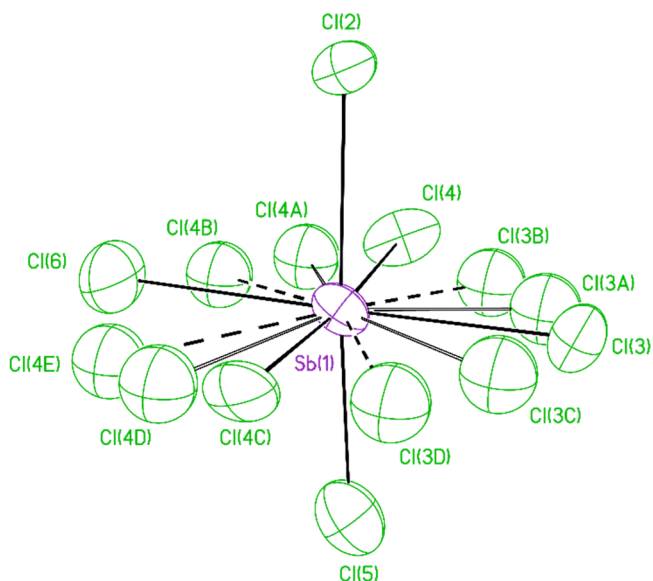

**Figure S14.** The antimonate anion in  $[(\text{Py}_5\text{Me}_2)\text{Ru}^{\text{II}}(\text{Cl})](\text{SbCl}_6)_{0.70}(\text{SbCl}_4)_{0.30} \cdot 2 \text{CH}_3\text{COCH}_3$  shown with 50% probability ellipsoids. All disordered atoms are shown.

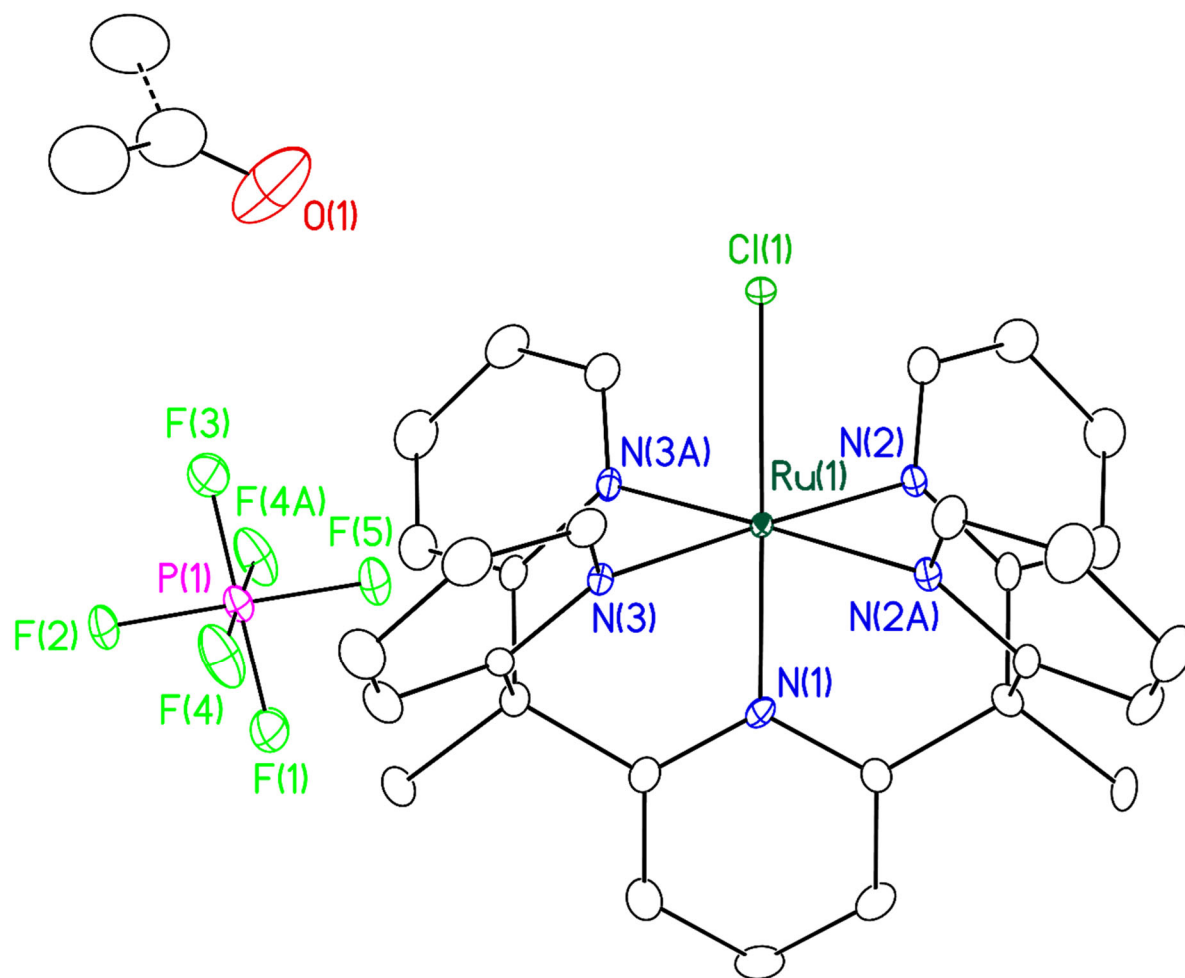

**Figure S15.** A molecular drawing of  $[(\text{Py}_5\text{Me}_2)\text{Ru}^{\text{II}}(\text{Cl})](\text{PF}_6) \cdot \text{CH}_3\text{COCH}_3$  shown with 50% probability ellipsoids. Only one out of two components (with equal occupancies) of the disordered acetone is shown. All H atoms are omitted.



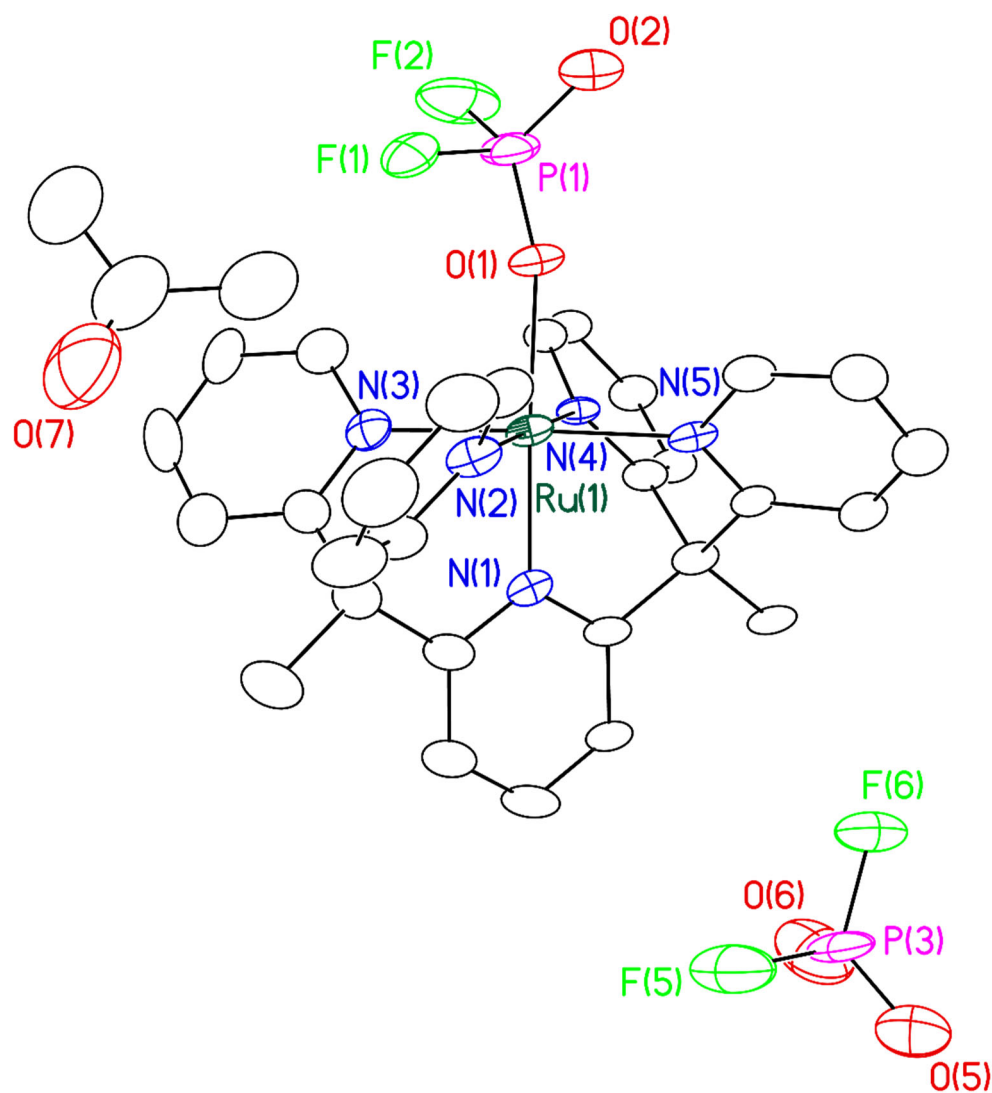

**Figure S16.** A molecular drawing of  $[(\text{Py}_5\text{Me}_2)\text{Ru}^{\text{II}}(\text{PO}_2\text{F}_2)](\text{PO}_2\text{F}_2)_{0.84}(\text{PF}_6)_{0.16} \cdot 0.5 \text{CH}_3\text{COCH}_3$  shown with 30% probability ellipsoids. Only the major component of the disordered  $\text{PO}_2\text{F}_2^-$  ligand, disordered counteranion and disordered acetone is shown. All H atoms are omitted.

### Calculation of Kinetic Parameters

The absorbance at  $\lambda = 551$  nm was monitored for the light-driven decomposition of **3** in dry acetone at  $-78$  °C. A nonlinear least-squares regression analysis was conducted for the equation  $[\mathbf{3}] = e^{-kt} [\mathbf{3}]_0$  using the MATLAB software with the lsqcurvefit and nlparci commands.<sup>18</sup> The analysis converged to a rate constant  $k = 0.327(4) \text{ min}^{-1}$  ( $5.45(6) \times 10^{-3} \text{ s}^{-1}$ ) for the first-order decay process.

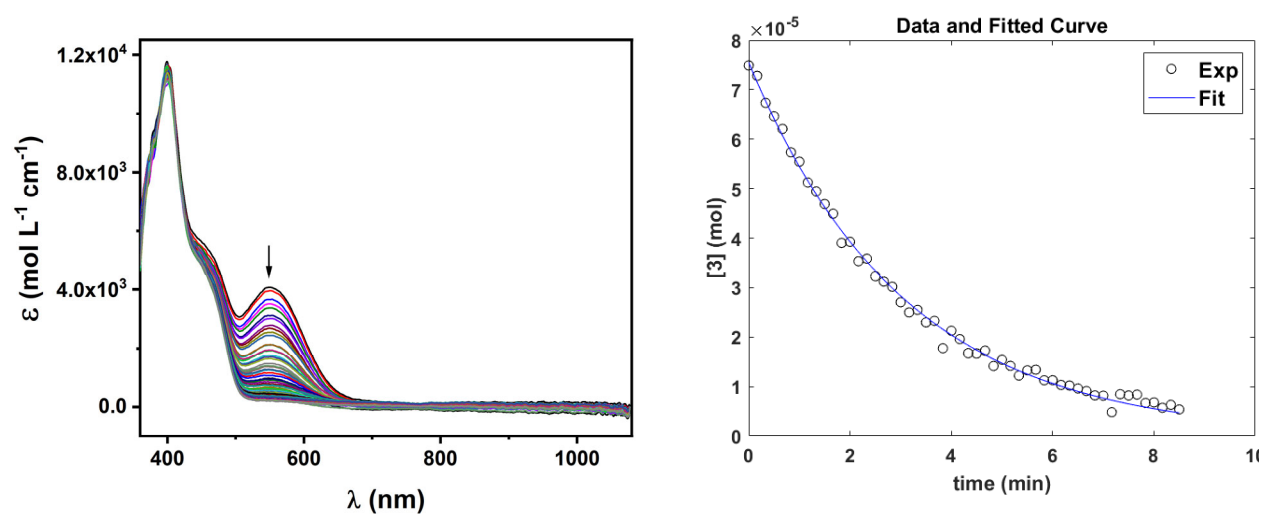

**Figure S17.** UV/vis traces obtained for the decomposition of **3** obtained at 10 second intervals (left), and a MATLAB fit to the absorbance values at  $\lambda = 551$  nm (right).

## Molecular Orbital Diagrams

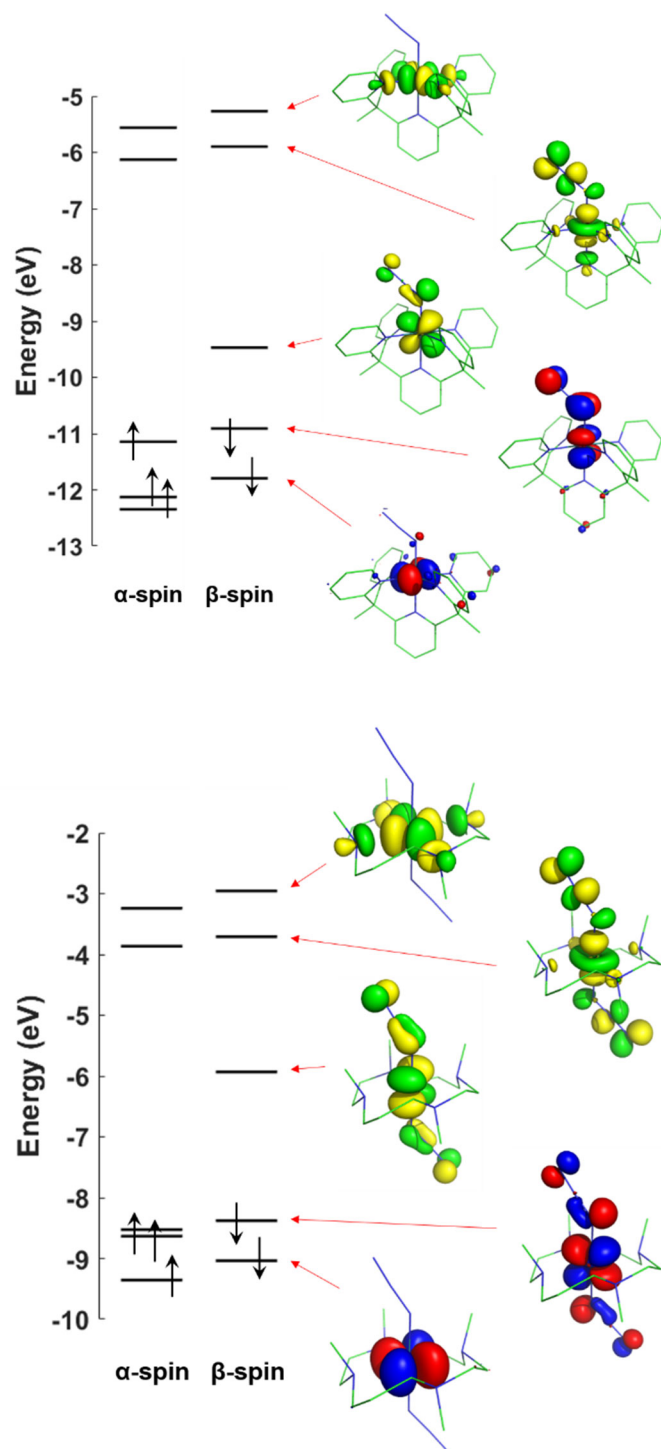

**Figure S18.** Calculated 4d orbital manifold for complexes **1** (below) and **3** (above). The red/blue colors indicate occupied while green/yellow colors indicate unoccupied beta spin MO's.

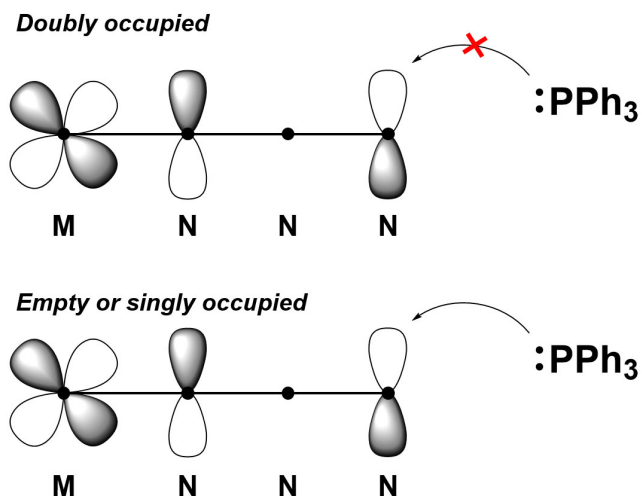

**Figure S19.** Strategy employed in this work for switching on metallo-Staudinger reactivity.

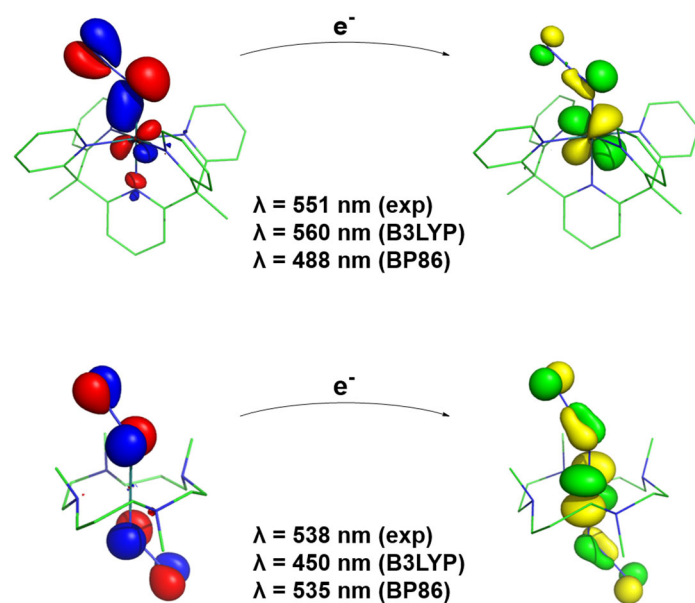

**Figure S20.** Electronic transitions that result from irradiation of **1** (below) and **3** (above), respectively.

Wavelength values are obtained either from the experimental UV/vis spectrum<sup>19</sup> or from a TD-DFT calculation using the functional in the parenthesis; the MO depictions are derived from B3LYP single point calculations.

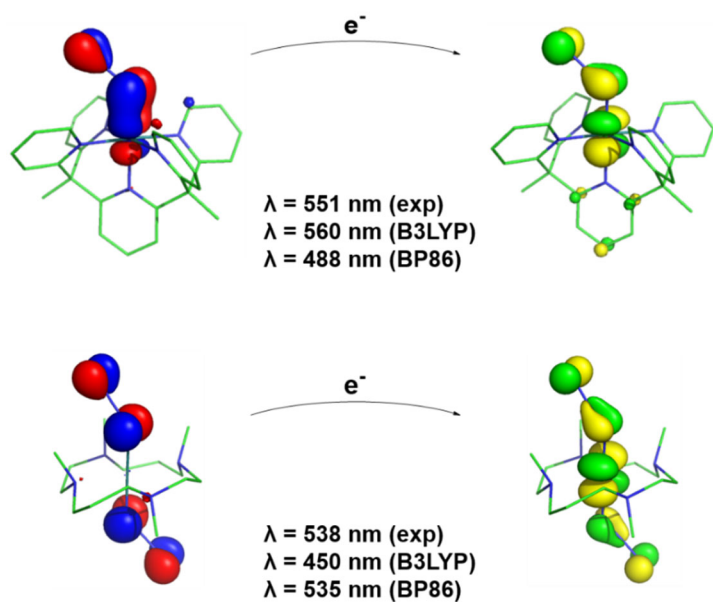

**Figure S21.** Electronic transitions that result from irradiation of **1** (below) and **3** (above), respectively. Wavelength values are obtained either from the experimental UV/vis spectrum<sup>19</sup> or from a TD-DFT calculation using the functional in the parenthesis; the MO depictions are derived from BP86 single point calculations.

## References

- 1 S. V. Park and J. F. Berry, *Dalton Trans.*, 2017, **46**, 9118–9125.
- 2 T. Nishinaga, *Organic Redox Systems*, John Wiley & Sons, Inc., 2016.
- 3 R. K. Harris, E. D. Becker, S. M. Cabral de Menezes, R. Goodfellow and P. Granger, *Pure Appl. Chem.*, 2001, **73**, 1795–1818.
- 4 R. K. Harris, E. D. Becker, S. M. Cabral de Menezes, P. Granger, R. E Hoffman and K. W. Zilm, *Pure Appl. Chem.*, 2008, **80**, 59–84.
- 5 W. J. Transue, J. Yang, M. Nava, I. V. Sergeyev, T. J. Barnum, M. C. McCarthy and C. C. Cummins, *J. Am. Chem. Soc.*, 2018, **140**, 17985–17991.
- 6 S. Ohzu, T. Ishizuka, H. Kotani and T. Kojima, *Chem. Commun.*, 2014, **50**, 15018–15021.
- 7 M. Althaus, C. Bonaccorsi, A. Mezzetti and F. Santoro, *Organometallics*, 2006, **25**, 3108–3110.
- 8 F. Neese, *Wiley Interdiscip. Rev. Comput. Mol. Sci.*, 2012, **2**, 73–78.
- 9 F. Weigend and R. Ahlrichs, *Phys. Chem. Chem. Phys.*, 2005, **7**, 3297–3305.
- 10 S. Grimme, J. Antony, S. Ehrlich and H. Krieg, *J. Chem. Phys.*, 2010, **132**, 154104.
- 11 S. Grimme, S. Ehrlich and L. Goerigk, *J. Comput. Chem.*, 2011, **32**, 1456–1465.
- 12 F. Weigend, *Phys. Chem. Chem. Phys.*, 2006, **8**, 1057–1065.
- 13 P. J. Stephens, F. J. Devlin, C. F. Chabalowski and M. J. Frisch, *J. Phys. Chem.*, 1994, **98**, 11623–11627.
- 14 A. Hellweg, C. Hättig, S. Höfener and W. Klopper, *Theor. Chem. Acc.*, 2007, **117**, 587–597.
- 15 J. Da Chai and M. Head-Gordon, *J. Chem. Phys.*, 2008, **128**, 084106.
- 16 Y. S. Lin, G. De Li, S. P. Mao and J. Da Chai, *J. Chem. Theory Comput.*, 2013, **9**, 263–272.
- 17 I. A. Guzei, *J. Appl. Crystallogr.*, 2014, **47**, 806–809.
- 18 C. L. Perrin, *J. Chem. Educ.*, 2017, **94**, 669–672.
- 19 C. M. Ho, H. C. Leung, S. Wu, K. H. Low, Z. Lin and C. M. Che, *Eur. J. Inorg. Chem.*, 2012, 151–159.
